# Supplementary material for: Species-specific chromatin landscape determines how transposable elements shape genome evolution
Source: eLife. 2022 Aug 23;11:e81567. doi: 10.7554/eLife.81567 (PMC9398452; doi:10.7554/eLife.81567)
Supplement: Supplementary file 1. — Genome-wide percentiles for correlation coefficient: –0.7142 (5%) and –0.5952 (10%); genome-wide percentiles for regression coefficient: –0.4208 (5%) and –0.3208 (10%). [file elife-81567-supp1.xlsx]

## Sheet: Sheet1
		magnitude			extent
FBgn	gene name	correlation coefficient	regression coefficient		correlation coefficient	regression coefficient
FBgn0000100	RpLP0	0.333333	-0.365006		-0.571429	-0.803806
FBgn0000662	fl(2)d	0.238095	0.176744		0.238095	0.221935
FBgn0001197	His2Av	-0.547619	-0.318632		-0.52381	-0.42173
FBgn0001308	Khc	-0.190476	-0.118085		-0.880952	-0.935146
FBgn0002780	mod	-0.166667	0.493375		0.690476	0.812689
FBgn0003449	snf	0	-0.207919		-0.357143	-0.192901
FBgn0003598	Su(var)3-7	-0.214286	-0.179676		0.452381	0.553724
FBgn0003607	Su(var)205	-0.547619	-0.120291		-0.214286	-0.315224
FBgn0003612	Su(var)2-10	0.214286	-0.0539584		0.547619	0.698574
FBgn0004103	Pp1-87B	-0.428571	0.00618874		-0.0952381	-0.407618
FBgn0004401	Pep	0.0238095	-0.140134		-0.0714286	0.046482
FBgn0004655	wapl	-0.166667	-0.158101		0.5	0.495649
FBgn0004914	Hnf4	-0.142857	0.395188		0.619048	0.516724
FBgn0005278	Sam-S	0.0952381	0.103309		0.857143	0.839573
FBgn0015268	Nap1	-0.357143	-0.239515		-0.0238095	0.347858
FBgn0015396	jumu	-0.285714	0.0406275		0.214286	0.176785
FBgn0015805	HDAC1	-0.238095	-0.209732		0.119048	0.334672
FBgn0020309	crol	0.214286	0.317292		-0.047619	0.17896
FBgn0025355	SuUR	-0.285714	-0.195611		0.357143	0.576509
FBgn0025639	Hmt4-20	-0.285714	0.190987		-0.142857	-0.122169
FBgn0026427	Su(var)2-HP2	-0.547619	0.0568354		0.190476	0.299347
FBgn0026573	ADD1	0.238095	0.109398		-0.547619	-0.595775
FBgn0027567	CG8108	-0.238095	-0.201094		0.52381	0.563258
FBgn0027835	Dp1	-0.5	0.0652598		0.047619	0.0871345
FBgn0027951	MTA1-like	-0.166667	-0.203733		0.5	0.3648
FBgn0028387	chm	0.190476	0.27363		0.0238095	0.317428
FBgn0030301	HP5	-0.547619	-0.0664994		0.595238	0.652739
FBgn0033233	Kdm4A	-0.0952381	-0.168264		0.619048	0.621859
FBgn0034217	Lhr	-0.690476	0.283907		-0.142857	0.0493839
FBgn0035829	HP4	-0.619048	-0.100069		0.0952381	0.0954934
FBgn0038551	Odj	-0.0952381	-0.219072		0.0714286	0.147147
FBgn0039338	XNP	-0.5	0.0612313		-0.380952	-0.358287
FBgn0040372	G9a	0	0.242316		0.619048	0.598314
FBgn0085424	nub	0.571429	0.48496		0.261905	0.348283
FBgn0086908	egg	0.0714286	-0.224752		0.0714286	0.197263
FBgn0087035	AGO2	0.738095	-0.407772		-0.380952	-0.613962
FBgn0260397	Su(var)3-3	0.380952	-0.404064		0.119048	0.157314
FBgn0263144	bin3	-0.738095	-0.407009		-0.214286	-1.23239
FBgn0263755	Su(var)3-9	-0.479051	-0.15688		0.347312	0.56901
FBgn0266557	kis	-0.547619	-0.110905		-0.214286	-0.307717
FBgn0266599	Hsc70-4	-0.619048	-0.30396		-0.0714286	-0.063536
